# Supplementary material for: Anticoagulation with osocimab in patients with kidney failure undergoing hemodialysis: a randomized phase 2 trial
Source: PubMed Central journal article supplement (PMC10878964; doi:10.1038/s41591-023-02794-7), 2024-02-16
Supplement: 41591_2023_2794_MOESM1_ESM.pdf [file 41591_2023_2794_MOESM1_ESM.pdf]

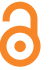

---

# Anticoagulation with osocimab in patients with kidney failure undergoing hemodialysis: a randomized phase 2 trial

---

In the format provided by the authors and unedited

---

## Supplementary Appendix

This appendix has been provided by the authors to give readers additional information about their work.

Supplement to: A Phase II Randomized Trial of Osocimab in Patients with Kidney Failure Undergoing Hemodialysis

### Table of contents

|                                                   |    |
|---------------------------------------------------|----|
| Author Affiliations .....                         | 2  |
| Steering Committee .....                          | 2  |
| Data Monitoring Committee .....                   | 3  |
| Clinical Events Adjudication Committee .....      | 4  |
| Study Sites and Investigators .....               | 5  |
| IEC and IRB list .....                            | 12 |
| Outcome Definitions .....                         | 33 |
| Safety outcomes .....                             | 33 |
| Clinically relevant bleeding .....                | 33 |
| Assessment of Arteriovenous Access Bleeding ..... | 34 |
| Adverse events .....                              | 35 |
| Efficacy Outcomes .....                           | 35 |
| Major adverse vascular events: .....              | 35 |
| Arteriovenous fistula or graft thrombosis: .....  | 36 |
| Dialysis circuit clotting .....                   | 36 |
| Known atherosclerosis .....                       | 36 |

## Author Affiliations

Thrombosis and Atherosclerosis Research Institute and McMaster University (J.I.W.) – both in Hamilton, Canada; Clinical Development and Operations, Bayer Consumer Care AG, Basel, Switzerland (L.B.T.); Division of Nephrology and Rheumatology, RWTH Aachen University Hospital, Aachen, Germany (J.F.); Centre for Cardiovascular Sciences, University of Edinburgh, Edinburgh, UK (K.F.); Mount Sinai Heart, Icahn School of Medicine at Mount Sinai Health System, New York, New York (D.L.B.); Emory University School of Medicine, Atlanta, Georgia (R.T.); Section of Nephrology, Baylor College of Medicine, Houston, Texas (W.C.W.) – all in the USA; Clinical Development and Operations, Bayer SA, Sao Paulo, Brazil (J.H.); Clinical Data Sciences and Analytics (A.F.P.) and Clinical Pharmacology (D.K.), Bayer AG- both in Wuppertal, Germany.

## Steering Committee

Steering Committee members

| Name                   | Function in Steering Committee | Specialty    | Voting Status |
|------------------------|--------------------------------|--------------|---------------|
| Ravi Thadhani          | Chair                          | Nephrologist | Voting member |
| Wolfgang C. Winkelmayr | Member                         | Nephrologist | Voting member |
| Jürgen Floege          | Member                         | Nephrologist | Voting member |
| Jeffrey I. Weitz       | Member                         | Hematologist | Voting member |
| Keith Fox              | Member                         | Cardiologist | Voting member |
| Deepak L. Bhatt        | Member                         | Cardiologist | Voting member |

Permanent Sponsor Members

| Name            | Function in Steering Committee | Voting Status    |
|-----------------|--------------------------------|------------------|
| László B. Tankó | Global Clinical Leader         | Voting member    |
| Claudia Rahner  | Study Statistician             | Nonvoting member |
| Kate Benson     | Clinical Project Manager       | Nonvoting member |
| Ariane Dihlmann | Global Safety Leader           | Nonvoting member |
| Dilsad Durmus   | Study Manager                  | Nonvoting member |
| James Hung      | Study Medical Expert           | Nonvoting member |

Beside the permanent members, ad hoc guests could be invited.

## Data Monitoring Committee

| Name                     | Expertise                                           | Affiliation                                                                                                                                                                                               |
|--------------------------|-----------------------------------------------------|-----------------------------------------------------------------------------------------------------------------------------------------------------------------------------------------------------------|
| Sam Schulmann (Chair)    | Hematologist                                        | McMaster University<br>237 Barton Street East<br>Hamilton, ON L8L 2X2<br>Canada                                                                                                                           |
| Peter Verhamme           | Vascular Medicine,<br>Thrombosis<br>and Haemostasis | University Hospitals Leuven<br>Herestraat 49<br>3000 Leuven<br>Belgium                                                                                                                                    |
| Tara I-Hsin Chang        | Nephrologist                                        | Stanford University<br>Department: Medicine -<br>Med/Nephrology<br>MC 5851<br>777 Welch Road Suite DE, Room D100<br>Stanford, California 94305-5851<br>USA                                                |
| Ashkan Shoamanesh        | Neurologist                                         | Population Health Research Institute<br>(PHRI)<br>237 Barton Street East<br>Hamilton, ON L8L 2X2<br>Canada                                                                                                |
| Johannes Mann            | Nephrologist                                        | KfH Kuratorium für Dialyse und<br>Nierentransplantation e.V.<br>KfH-Nierenzentrum<br>Isoldenstraße 15<br>80804 München - Schwabing                                                                        |
| Christopher Bull Granger | Cardiologist                                        | Duke University Scholl of Medicine<br>200 Morris Street<br>Durham, NC 27701<br>USA                                                                                                                        |
| Robin Roberts            | Biostatistician                                     | Professor Emeritus,<br>Department of Health Research<br>Methods, Evidence, and Impact<br>McMaster University<br>McMaster Health Sciences Centre<br>1200 Main St W<br>Hamilton, Ontario, Canada<br>L8N 3Z5 |

## Clinical Events Adjudication Committee

| Name*                         | Role                       |
|-------------------------------|----------------------------|
| <b>Principal investigator</b> |                            |
| Renato Lopes, M.D.            | CEC PI: phase 1–2 reviewer |
| <b>Faculty reviewers</b>      |                            |
| Brad Kolls, M.D.              | Neuro: phase 1–2 reviewer  |
| David Kong, M.D.              | Phase 1–2 reviewer         |
| Dedrick Jordan, M.D.          | Neuro: phase 1–2 reviewer  |
| Rob Harrison, M.D.            | Phase 1–2 reviewer         |
| Robert McGarran, M.D.         | Phase 1–2 reviewer         |
| Shreyansh Shah, M.D.          | Phase 1–2 reviewer         |
| Thomas Povsic, M.D.           | Phase 1–2 reviewer         |
| Patrick Pun, M.D.             | Phase 1–2 reviewer         |

\*Adjudicators are faculty members of the Duke Clinical Research Institute.

## Study Sites and Investigators

| Country   | Site                                                       | Principal Investigator            | Participants enrolled (no.) |
|-----------|------------------------------------------------------------|-----------------------------------|-----------------------------|
| Australia | John Hunter Hospital                                       | Dr Alastair Gillies               | 2                           |
|           | Eastern Health Integrated Renal Service                    | Dr Matthew Roberts                | 1                           |
|           | Sydney Adventist Hospital                                  | Dr Muh Geot Wong                  | 2                           |
|           | Westmead Hospital                                          | Dr Vincent Lee                    | 1                           |
| Austria   | Klinik Landstraße - Krankenhaus Rudolfstiftung             | Prof Bernhard Ludvik              | 2                           |
|           | Klinikum Klagenfurt am Wörthersee                          | Prof Dr Markus Peck-Radosavljevic | 1                           |
|           | Universitätsklinikum AKH Wien                              | Prof Rainer Oberbauer             | 10                          |
|           | Privatklinik Wehrle-Diakonissen                            | Prof Dr Raimund Weitgasser        | 1                           |
| Belgium   | UZ Leuven Gasthuisberg                                     | Prof Bjorn Meijers                | 7                           |
|           | Epicura                                                    | Dr Frédéric Debelle               | 3                           |
|           | Imeldaziekenhuis - St-Elisabethkliniek                     | Dr Wim Lemahieu                   | 5                           |
|           | AZ Nikolaas Campus Sint-Niklaas                            | Dr Johan De Meester               | 7                           |
|           | CHU de Liege   CHR Citadel - Department of Nephrology      | Dr Luc Radermacher                | 1                           |
|           | AZ St-Lucas Campus St-Lucas                                | Dr Céline Seghers                 | 2                           |
| Bulgaria  | UMHAT Kanev AD                                             | Dr Radka Karagyozeva              | 12                          |
|           | MHAT Sveti Ivan Rilski 2003                                | Prof Pencho Simeonov              | 7                           |
|           | MHAT Haskovo                                               | Dr Vladimir Popiliev              | 5                           |
|           | Multiprofile Hospital for Active Treatment Hristo Botev AD | Prof Valeri Simeonov              | 7                           |
|           | MHAT Shumen AD                                             | Dr Nedyu Nedev                    | 12                          |
| Czechia   | Krajska Nemocnice Liberec a.s.                             | Dr Miroslav Ryba                  | 7                           |
|           | Privamed s.r.o.                                            | Dr Jan Wirth                      | 2                           |
|           | Fresenius Nephro Care s.r.o. - Sokolov                     | Dr Jiri Vlasak                    | 5                           |
|           | Fakultni nemocnice Ostrava                                 | Dr Ivo Valkovsky                  | 2                           |
| Greece    | General Hospital of Athens LAIKO                           | Prof Ioannis Boletis              | 1                           |

|         |                                                               |                                |    |
|---------|---------------------------------------------------------------|--------------------------------|----|
|         | General Hospital of Thessaloniki Papageorgiou                 | Dr Dorothea Papadopoulou       | 4  |
|         | Hippokration General Hospital of Thessaloniki                 | Dr Aikaterini Papagianni       | 3  |
|         | University General Hospital of Larissa                        | Prof Ioannis Stefanidis        | 4  |
|         | HIPPOKRATION General Hospital of Athens                       | Dr Dimitrios Petras            | 5  |
|         | Ioannina University General Hospital                          | Prof Evangelia Ntounousi       | 2  |
|         | General Hospital of Arta                                      | Dr Chariklia Gouva             | 11 |
| Hungary | Keszthelyi Korhaz                                             | Dr Laszlo Kovats               | 3  |
|         | Bajai Szent Rokus Korhaz                                      | Dr Katalin Magyar              | 9  |
|         | Csongrad Megyei Egeszsegugyi Ellato Kozpont,Hodmezovasa rhely | Dr Ildiko Csaszar              | 14 |
|         | Fresenius Medical Care Egeszsegugyi Kft.                      | Dr Botond Csiky                | 11 |
|         | Fresenius Medical Care Egeszsegugyi Kft.                      | Dr Erzsebet Ladanyi            | 4  |
|         | Fresenius Medical Care Egeszsegugyi Kft.                      | Dr Peter Kevei                 | 8  |
|         | Magyar Honvedseg Egeszsegugyi Kozpont                         | Dr Karoly Schneider            | 7  |
| Israel  | Health Corporation of Galilee Medical Center                  | Dr Etty (Esther) Kruzel-Davila | 2  |
|         |                                                               | Dr Khaled Khazim               |    |
|         | Poriya Medical Center   Nephrology and Hypertension Dept.     | Dr Evgeny Farber               | 8  |
|         | Barzilai Medical Center   Nephrology & Hypertension Dept.     | Prof Yoram Yagil               | 9  |
|         | Clalit Health Services Rabin Medical Center- Beilinson Campus | Prof Benaya Rozen-Zvi          | 4  |
|         | Shamir Medical Center (Assaf Harofeh)                         | Prof Ilia Beberashvili         | 8  |
|         | Lady Davis Carmel Medical Center                              | Dr Victor Frajewicki           | 4  |
|         | Rabin Medical Center, HaSharon (Golda) Campus                 | Prof Benaya Rozen-Zvi          | 5  |

|                        |                                                                   |                             |    |
|------------------------|-------------------------------------------------------------------|-----------------------------|----|
| Italy                  | Fondazione Policlinico<br>Universitario Agostino<br>Gemelli IRCCS | Prof Giuseppe Grandaliano   | 4  |
|                        | A.O.U. Careggi                                                    | Dr Calogero Lino Cirami     | 3  |
|                        | IRCCS Istituti Clinici<br>Scientifici Maugeri SpA SB              | Prof Ciro Esposito          | 3  |
|                        | A.O.U. di Parma                                                   | Prof Enrico Fiaccadori      | 2  |
|                        | A.O.U. di Bologna<br>Policlinico S.Orsola<br>Malpighi             | Prof Gaetano La Manna       | 4  |
|                        | IRCCS Ospedale Policlinico<br>San Martino                         | Dr Maura Ravera             | 3  |
|                        | AUSL-IRCCS di Reggio<br>Emilia                                    | Dr Maria Cristina Gregorini | 1  |
| Japan                  | Saiyu Clinic                                                      | Dr Noriyuki Kato            | 3  |
|                        | Kikuchi Medical Clinic                                            | Dr Hiroshi Kikuchi          | 6  |
|                        | Akagaki Clinic                                                    | Dr Yoji Akagaki             | 6  |
|                        | Saint Hill Hospital                                               | Dr Zenzo Fujii              | 11 |
|                        | Katta General Hospital                                            | Dr Sadayoshi Ito            | 8  |
|                        |                                                                   | Dr Yorihiro Akamatsu        |    |
|                        | Yabuki Hospital                                                   | Dr Ikuto Masakane           | 6  |
|                        | Ohishi Naika Clinic                                               | Dr Akira Ohishi             | 4  |
|                        | Kyoto Station Takeda<br>Dialysis Clinic                           | Dr Tetsuro Yoshioka         | 5  |
|                        | Nagaoka Red Cross Hospital                                        | Dr Hajime Yamazaki          | 2  |
|                        | Ibaraki Seinan Medical<br>Center Hospital                         | Dr Tadashi Iitsuka          | 2  |
|                        | Takemura Medical Nephro<br>Clinic                                 | Dr Katsumi Takemura         | 2  |
|                        | Akebono Clinic                                                    | Dr Motoko Tanaka            | 2  |
|                        | Futakotamagawaekima e<br>clinic                                   | Dr Toshikazu Imai           | 2  |
| Tsuchiura Beryl Clinic | Dr Masaru Mori                                                    | 6                           |    |
| Lithuania              | LUHS Kauno Hospital<br>(Josvainiu str.)                           | Dr Gintautas Gumbrevicius   | 6  |
| Netherlands            | Academisch Medisch<br>Centrum (AMC)                               | Dr Liffert Vogt             | 3  |
|                        | Catharina Ziekenhuis                                              | Dr Stijn Konings            | 2  |
|                        | Deventer Ziekenhuis                                               | Dr Cornelius Doorenbos      | 1  |
|                        |                                                                   | Dr Daan de Boer             |    |
| Maasstad Ziekenhuis    | Dr Rene van den Dorpel                                            | 3                           |    |



|                       |                                                                   |                            |    |
|-----------------------|-------------------------------------------------------------------|----------------------------|----|
|                       | Albert Schweitzer<br>Ziekenhuis, Locatie<br>Dordwijk              | Dr Jeroen van der Net      | 3  |
|                       | Gelre Ziekenhuizen                                                | Dr Jos Barendregt          | 3  |
| Poland                | Stacja Dializ W-wa<br>Mangalia                                    | Dr Marta Serwanska-Swietek | 6  |
|                       | Wojewodzki Szpital<br>Zespolony                                   | Prof Andrzej Jaroszynski   | 4  |
|                       | NZOZ Nowy Szpital w<br>Swieciu Sp. z o.o.                         | Dr Andrzej Brymora         | 8  |
|                       | Stacja Dializ Olkusz                                              | Dr Pawel Kozminski         | 7  |
|                       | Stacja Dializ Zyrardow                                            | Dr Krzysztof Wroblewski    | 5  |
| Portugal              | Eurodial Obidos (DaVita)                                          | Prof Andre Weigert         | 1  |
|                       | CHLO - Hospital Santa Cruz                                        | Dr Rita Birne              | 4  |
|                       | NephroCare APDP                                                   | Dr Patricia Branco         | 6  |
|                       | Pluribus Dialise - Cascais<br>(DaVita)                            | Dr Jorge Dickson           | 4  |
|                       | CHMT - Hospital Rainha<br>Santa Isabel - Servico de<br>Nefrologia | Dr Hernani Goncalves       | 2  |
|                       | Caledial - Centro de<br>Hemodialise de Gaia                       | Prof Serafim Guimaraes     | 3  |
|                       | Diaverum Aveiro                                                   | Dr Lidia Santos            | 2  |
|                       | Eurodial Leiria (DaVita)                                          | Dr Joana Silva Costa       | 4  |
|                       | Pluribus Dialise - Sacavem<br>(DaVita)                            | Dr Artur Mendes            | 4  |
|                       | SPD - Amadora (Diaverum<br>Amadora)                               | Dr Hugo Neves Silva        | 4  |
| Russian<br>Federation | Sverdlovsk Regional<br>Clinical Hospital #1                       | Dr Elena Boretskaya        | 4  |
|                       | City Hospital #31                                                 | Dr Galina Timokhovskaya    | 19 |
|                       | LLC Fresenius medical care<br>Kuban                               | Dr Lubov Eremeeva          | 5  |
|                       | LLC B. Brown Avitum<br>Russland Clinics                           | Dr Anastasiya Sabodash     | 27 |
|                       | LLC Dialysis center                                               | Dr Natalia Novoseltseva    | 5  |
|                       | LLC Dialysis center                                               | Dr Irina Selezneva         | 4  |
|                       | LLC Yaroslavl dialysis<br>center                                  | Dr Tatyana Abissova        | 19 |
|                       | Republican Hospital<br>n.a. V.A. Baranov                          | Dr Aleksandr Zuev          | 5  |
|                       | Kupchinsky center for<br>outpatient dialysis                      | Dr Alexey Tutin            | 7  |

|         |                                                         |                               |    |
|---------|---------------------------------------------------------|-------------------------------|----|
|         | Chelyabinsk Regional Clinical Hospital                  | Dr Lyudmila Zhuravleva        | 8  |
|         | City Clinical Hospital #1 Orenburg                      | Dr Alexandr Selyutin          | 20 |
| Spain   | Corporació Sanitària Parc Taulí                         | Dr José Antonio Ibeas López   | 3  |
|         | Hospital Clínic Universitario de Valencia               | Dr Jose Gorriz Teruel         | 1  |
|         | Hospital Clínic Universitario de Santiago de Compostela | Dr Candido Diaz Rodriguez     | 1  |
|         |                                                         | Dra Dolores Güimil Carbajal   |    |
|         | Hospital Universitario Dr Peset                         | Dr Pablo Molina Vila          | 5  |
|         | Hospital Althaia, Xarxa Assistencial de Manresa         | Dr Josep Maria Galcerán Gui   | 5  |
|         | Hospital Clinico Universitario San Carlos   Nefrologia  | Dr José Antonio Herrero Calvo | 4  |
|         | Hospital Universitari Germans Trias i Pujol             | Dr Fredzzia Graterol Torres   | 3  |
| Turkey  | Kocaeli Universitesi Tip Fakultesi                      | Dr Necmi Eren                 | 8  |
|         | Hacettepe Universitesi Tip Fakultesi                    | Prof Mustafa Arici            | 3  |
|         | Turk Bobrek Vakfı Memorial Hizmet Hastanesi             | Dr Funda Yalcin               | 3  |
|         | Erciyes Universitesi Tip Fakultesi                      | Dr Ismail Kocyigit            | 4  |
|         | Inonu Universitesi Tip Fakultesi                        | Mr Bayram Berktaş             | 4  |
|         |                                                         | Prof Idris Sahin              |    |
|         | Adnan Menderes Universitesi Tip fakultesi               | Prof Yavuz Yenicerioglu       | 2  |
|         | Sisli Hamidiye Etfal Egitim ve Arastirma Hastanesi      | Prof Abdulkadir Unsal         | 1  |
| Ukraine | Brovarskaya multidisciplinary clinical hospital         | Dr Andrii Shen                | 7  |
|         | Kyiv City Center of Nephrology and Dialysis             | Dr Iryna Dudar                | 12 |
|         | Medical center LLC (Fresenius medical care Ukraine)     | Dr Volodymyr Novakivskyy      | 13 |

|     |                                                             |                        |    |
|-----|-------------------------------------------------------------|------------------------|----|
|     | Regional Clinical Hospital - Ivano- Frankivsk               | Dr Oleg Legun          | 9  |
|     | Kharkiv regional Clinical Centre of urology and nephrology  | Dr Sergiy Kolupayev    | 7  |
|     | State Institution “Institute of Nephrology” NAMS of Ukraine | Dr Mykola Kolesnyk     | 10 |
|     | Lutsk city clinical hospital                                | Dr Tetyana Trigub      | 3  |
|     | Mykolaiv Regional Clinical Hospital                         | Dr Tetyana Kostynenko  | 6  |
|     | Vinnitsa Regional Clinical Hospital im. N.I. Pirogov        | Dr Nataliia Pyvovarova | 7  |
|     | Zaporizhzhia Regional Clinical Hospital                     | Dr Svitlana Korneyeva  | 13 |
|     | Transcarpatian Regional Clinical Hospital                   | Dr Vasyl Stryzhak      | 16 |
|     | Dnepropetrovsk regional hospital n.a. I. I. Mechnikov       | Dr Olga Galushchak     | 12 |
|     | Poltava Regional Clinical Hospital n.a. M.V. Skliphosovskyi | Dr Galyna Osinnia      | 5  |
| USA | Davita Hospital Hill Dialysis                               | Dr Ahmed Awad          | 21 |
|     | Fresenius Kidney Care - Brawley                             | Dr Ramin Berenji       | 6  |
|     | Fresenius Kidney Care Evergreen Park                        | Dr Paul Crawford       | 22 |
|     | DaVita Butler Farm Dialysis                                 | Dr Olayiwola Ayodeji   | 4  |
|     | ARA Holyoke Dialysis Center                                 | Dr Michael Germain     | 2  |
|     | Fresenius Kidney Care South Dialysis                        | Dr Marwan Omar Kaskas  | 8  |
|     | Waterloo Dialysis                                           | Dr Judith Betts        | 2  |
|     | ARA Augusta                                                 | Dr Devesh Patel        | 2  |
|     | Fresenius Kidney Care - La Mesa                             | Dr George Fadda        | 12 |
|     | DaVita South Valley Dialysis                                | Dr Kenneth Kleinman    | 3  |
|     | Renal Medicine Associates                                   | Dr Jayant Kumar        | 1  |
|     | Liberty Dialysis- Caldwell                                  | Dr Arnold Silva        | 3  |
|     | ARA Plantation Dialysis, LLC                                | Dr Hakan Toka          | 3  |

|                                                    |                       |    |
|----------------------------------------------------|-----------------------|----|
| DaVita Greater Waterbury Dialysis                  | Dr Sina Raissi        | 4  |
| North America Research Institute - Azusa           | Dr Aamir Jamal        | 5  |
| Van Buren Dialysis Center                          | Dr Mohammed Khan      | 14 |
| East L.A. Dialysis Center                          | Dr Carlos Meza        | 9  |
| FMC San Ysidro                                     | Dr Jill Meyer         | 2  |
| Fresenius Kidney Care Kearny Mesa                  | Dr Dylan Steer        | 10 |
| Durham Nephrology Associates, Pa                   | Dr Amarnath Kathresal | 4  |
| Fresenius Kidney Care Baton Rouge Mancuso Lane     | Dr Michael Roppolo    | 3  |
| Fresenius Kidney Care Sugar Land                   | Dr Charles Henry      | 1  |
| Liberty Dialysis St. George                        | Dr Andrew Patchett    | 2  |
| Fresenius North Austin Dialysis Center             | Dr Eileen Cook        | 3  |
| Fresenius Kidney Care – Mission Bend (FMCNA #3971) | Dr Marializa Bernardo | 8  |
| Queen’s Dialysis Unit                              | Dr Nitin Bhasin       | 15 |

## IEC and IRB list

| T Number | TC Country / Region | TC Centre Name                          | TC Centre Location Address                                                                                                                                                                   | TC Centre Location-Province | TU Centre Name                          | TU Centre Location Address                                                                                                                                        | TU Centre Location-Province | TU Number | TU Reference  |
|----------|---------------------|-----------------------------------------|----------------------------------------------------------------------------------------------------------------------------------------------------------------------------------------------|-----------------------------|-----------------------------------------|-------------------------------------------------------------------------------------------------------------------------------------------------------------------|-----------------------------|-----------|---------------|
| 20115    | Australia           | Gold Coast Hospital                     | Gold Coast Hospital Gold Coast Hospital and Health Service HREC Office for Research Governance and Development Level 2 Block E – Pathology and Education 1 Hospital Boulevard 4215 Southport | Queensland (AU-QLD)         |                                         |                                                                                                                                                                   |                             |           |               |
|          |                     |                                         |                                                                                                                                                                                              |                             | Eastern Health Integrated Renal Service | Eastern Health Integrated Renal Service, Office of Research and Ethics, Eastern Health, Level 4, 5 Arnold St, 3128, Box Hill, AU-VIC                              | Victoria (AU-VIC)           | 40006     | Not Available |
|          |                     |                                         |                                                                                                                                                                                              |                             | John Hunter Hospital                    | John Hunter Hospital, Hunter New England Human Research Ethics Committee, Lookout Road, 2305, New Lambton,                                                        |                             | 40003     | Not Available |
|          |                     |                                         |                                                                                                                                                                                              |                             | Sydney Adventist Hospital               | Sydney Adventist Hospital, Research and Governance Office, Adventist HealthCare Limited, 185 Fox Valley Road, 2076, Wahroonga, AU-NSW                             | New South Wales (AU-NSW)    | 40007     | Not Available |
|          |                     |                                         |                                                                                                                                                                                              |                             | Westmead Hospital                       | Westmead Hospital, Sydney West Area Health Service Human Research Ethics Committee, Nepean Campus, Court Building, Ground Floor, PO Box 63, 2751, Penrith, AU-NSW | New South Wales (AU-NSW)    | 40009     | Not Available |
|          |                     | Westmead Hospital                       | Westmead Hospital HREC Clinical Sciences Hawkesbury Rd. 2145 Westmead                                                                                                                        | New South Wales (AU-NSW)    |                                         |                                                                                                                                                                   |                             |           |               |
|          |                     | Eastern Health Integrated Renal Service | Eastern Health Integrated Renal Service, Office of Research and Ethics, Eastern Health, Level 4, 5 Arnold St, 3128, Box Hill, AU-VIC                                                         | Victoria (AU-VIC)           | 40006                                   | Not Available                                                                                                                                                     |                             |           |               |

| T Number | TC Country / Region | TC Centre Name                | TC Centre Location Address                                                                                    | TC Centre Location-Province | TU Centre Name                  | TU Centre Location Address                                                                                                                                        | TU Centre Location-Province | TU Number | TU Reference  |
|----------|---------------------|-------------------------------|---------------------------------------------------------------------------------------------------------------|-----------------------------|---------------------------------|-------------------------------------------------------------------------------------------------------------------------------------------------------------------|-----------------------------|-----------|---------------|
|          |                     |                               |                                                                                                               |                             | John Hunter Hospital            | John Hunter Hospital, Hunter New England Human Research Ethics Committee, Lookout Road, 2305, New Lambton,                                                        |                             | 40003     | Not Available |
|          |                     |                               |                                                                                                               |                             | Sydney Adventist Hospital       | Sydney Adventist Hospital, Research and Governance Office, Adventist HealthCare Limited, 185 Fox Valley Road, 2076, Wahroonga, AU-NSW                             | New South Wales (AU-NSW)    | 40007     | Not Available |
|          |                     |                               |                                                                                                               |                             | Westmead Hospital               | Westmead Hospital, Sydney West Area Health Service Human Research Ethics Committee, Nepean Campus, Court Building, Ground Floor, PO Box 63, 2751, Penrith, AU-NSW | New South Wales (AU-NSW)    | 40009     | Not Available |
|          | Austria             | Medizinische Universität Graz | Medizinische Universität Graz Ethikkommission der Medizinischen Universität Graz Auenbruggerplatz 2 8036 Graz | Steiermark (AT-STM)         |                                 |                                                                                                                                                                   |                             |           |               |
|          | Belgium             | UZ Antwerpen                  | UZ Antwerpen Ethisch Comité Drie Eikenstraat 655 2650 EDEGEM                                                  |                             |                                 |                                                                                                                                                                   |                             |           |               |
|          |                     |                               |                                                                                                               |                             | AZ Nikolaas Campus Sint-Niklaas | AZ Nikolaas Campus Sint-Niklaas, Ingang Moerlandstraat, Moerlandstraat 1, 9100, SINT-NIKLAAS,                                                                     |                             | 28005     | Not Available |
|          |                     |                               |                                                                                                               |                             | AZ St-Lucas Campus St-Lucas     | AZ St-Lucas Campus St-Lucas, Ethisch Comité, Groenebriel 1, 9000, GENT,                                                                                           |                             | 28007     | Not Available |

| T Number | TC Country / Region | TC Centre Name                           | TC Centre Location Address                                                 | TC Centre Location-Province | TU Centre Name                         | TU Centre Location Address                                                                                   | TU Centre Location-Province | TU Number | TU Reference  |
|----------|---------------------|------------------------------------------|----------------------------------------------------------------------------|-----------------------------|----------------------------------------|--------------------------------------------------------------------------------------------------------------|-----------------------------|-----------|---------------|
|          |                     |                                          |                                                                            |                             | CHR de la Citadelle                    | CHR de la Citadelle, CHR de la Citadelle, Comité Ethique, Boulevard du 12e de Ligne 1, 4000, LIEGE,          |                             | 28006     | Not Available |
|          |                     |                                          |                                                                            |                             | Epicura                                | Epicura, Epicura, Site de Baudour, Comité Ethique, Rue Louis Caty 136, 7331, BAUDOOUR,                       |                             | 28002     | Not Available |
|          |                     |                                          |                                                                            |                             | Imeldaziekenhuis - St-Elisabethkliniek | Imeldaziekenhuis - St-Elisabethkliniek, Ethisch Comité, Imeldalaan 9 , 2820, BONHEIDEN,                      |                             | 28003     | Not Available |
|          |                     |                                          |                                                                            |                             | UZ Leuven Gasthuisberg                 | UZ Leuven Gasthuisberg, Ethische Commissie Onderzoek UZ/KU Leuven, Herestraat 49, 3000, LEUVEN,              |                             | 28001     | 28001         |
|          | Bulgaria            | Ethical Committee for Multicenter Trials | Ethical Committee for Multicenter Trials<br>Damyán Gruev Str. 8 1303 Sofia |                             |                                        |                                                                                                              |                             |           |               |
|          | Czechia             | Etická Komise                            | Etická Komise Fakultní nemocnice Brno<br>Jihavská 20 62500 Brno            |                             |                                        |                                                                                                              |                             |           |               |
|          |                     |                                          |                                                                            |                             | EK Fakultní nemocnice Ostrava          | EK Fakultní nemocnice Ostrava, ETICKÁ KOMISE Fakultní nemocnice Ostrava, 17 Listopadu 1790, 708 52, Ostrava, |                             | 38008     | Not Available |

| T Number | TC Country / Region | TC Centre Name                                        | TC Centre Location Address                                                             | TC Centre Location-Province | TU Centre Name                                   | TU Centre Location Address                                                                                                  | TU Centre Location-Province | TU Number | TU Reference  |
|----------|---------------------|-------------------------------------------------------|----------------------------------------------------------------------------------------|-----------------------------|--------------------------------------------------|-----------------------------------------------------------------------------------------------------------------------------|-----------------------------|-----------|---------------|
|          |                     |                                                       |                                                                                        |                             | EK Fresenius Medical Care – DS, s.r.o            | EK Fresenius Medical Care – DS, s.r.o, ETICKA KOMISE Fresenius Medical Care – DS, s.r.o, Evropska 423/178, 160 00, Praha 6, |                             | 38005     | Not Available |
|          |                     |                                                       |                                                                                        |                             | Eticka Komise                                    | Eticka Komise, Fakultni nemocnice Brno, Jihavska 20, 62500, Brno,                                                           |                             | 38004     | Not Available |
|          |                     |                                                       |                                                                                        |                             | Eticka komise pri Krajske nemocnici Liberec a.s. | Eticka komise pri Krajske nemocnici Liberec a.s., Husova 10, Krajska nemocnice Liberec a.s., 460 63, Liberec,               |                             | 38002     | Not Available |
|          | Greece              | National Ethics Committee                             | National Ethics Committee 284 Mesogeion Avenue 15562 Cholargos/Athens                  |                             |                                                  |                                                                                                                             |                             |           |               |
|          | Hungary             | Medical Research Council EC for Clinical Pharmacology | Medical Research Council EC for Clinical Pharmacology Alkotmany utca 25. 1054 Budapest |                             |                                                  |                                                                                                                             |                             |           |               |
|          |                     |                                                       |                                                                                        |                             | B-A-Z MK es EOK IKEB                             | B-A-Z MK es EOK IKEB, Szentpeteri kapu 72-76., 3526, Miskolc,                                                               |                             | 46006     | Not Available |
|          |                     |                                                       |                                                                                        |                             | Bajai Szent Rokus Korhaz IKEB                    | Bajai Szent Rokus Korhaz IKEB, Rokus u. 10., 6500, Baja,                                                                    |                             | 46003     | Not Available |



| T Number | TC Country / Region | TC Centre Name | TC Centre Location Address | TC Centre Location-Province | TU Centre Name                                                | TU Centre Location Address                                                                                                   | TU Centre Location-Province | TU Number | TU Reference  |
|----------|---------------------|----------------|----------------------------|-----------------------------|---------------------------------------------------------------|------------------------------------------------------------------------------------------------------------------------------|-----------------------------|-----------|---------------|
|          |                     |                |                            |                             | Csongrad Megyei Eu Ellato Kozpont, IKEB                       | Csongrad Megyei Eu Ellato Kozpont, IKEB, Dr. Imre J. u. 2., 6800, Hodmezovasarhely,                                          |                             | 46004     | Not Available |
|          |                     |                |                            |                             | Keszthelyi Korhaz IKEB                                        | Keszthelyi Korhaz IKEB, Ady Endre u. 2., 8360, Keszthely,                                                                    |                             | 46002     | Not Available |
|          |                     |                |                            |                             | MH Eu Kozpont Intezmenyi es Region. Kutatassetikai Bizottsag  | MH Eu Kozpont Intezmenyi es Region. Kutatassetikai Bizottsag, Robert Karoly korut 44., 1134, Budapest,                       |                             | 46009     | Not Available |
|          |                     |                |                            |                             | PTE-OEC IKEB                                                  | PTE-OEC IKEB, Pecs Tudomanyegyetem Klinikai Kozpont, Regionalis Kutatassetikai Bizottsaga, Rakoczi u. 2., 7624, Pecs,        |                             | 46005     | Not Available |
|          |                     |                |                            |                             | Regionalis, Intezmenyi Tudomanyos es Kutatassetikai Bizottsag | Regionalis, Intezmenyi Tudomanyos es Kutatassetikai Bizottsag, Ulloi ut 93. fsz. 2., 1091, Budapest,                         |                             | 46007     | Not Available |
|          | Israel              |                |                            |                             | Barzilai Medical Center                                       | Barzilai Medical Center, Ethics Committee, Hahistadrout St 2, 7830604, Ashkelon,                                             |                             | 39003     | Not Available |
|          |                     |                |                            |                             | Clalit Health Services Rabin Medical Center-Beilinson Campus  | Clalit Health Services Rabin Medical Center-Beilinson Campus, Ethical Committee, 39 Jabotinski Street, 4941492, Petah Tikva, |                             | 39005     | 39005*        |

| T Number | TC Country / Region | TC Centre Name | TC Centre Location Address | TC Centre Location-Province | TU Centre Name                                  | TU Centre Location Address                                                                                                                                                                                        | TU Centre Location-Province | TU Number | TU Reference  |
|----------|---------------------|----------------|----------------------------|-----------------------------|-------------------------------------------------|-------------------------------------------------------------------------------------------------------------------------------------------------------------------------------------------------------------------|-----------------------------|-----------|---------------|
|          |                     |                |                            |                             |                                                 |                                                                                                                                                                                                                   |                             | 39008     | 39005-1       |
|          |                     |                |                            |                             | Health Corporation of Galilee Medical Center    | Health Corporation of Galilee Medical Center, Ethical Committee, Ben Zvi Avenue, Road 89, P.O.B 21, 2210001, Nahariya,                                                                                            |                             | 39001     | Not Available |
|          |                     |                |                            |                             | Lady Davis Carmel Medical Center                | Lady Davis Carmel Medical Center, Ethics Committee, 7, Michal Street, 3436212, Haifa,                                                                                                                             |                             | 39007     | Not Available |
|          |                     |                |                            |                             | Shamir Medical Center (Assaf Harofeh)           | Shamir Medical Center (Assaf Harofeh), Ethical Committee, Pavilion 206, 7030000, Zrifin,                                                                                                                          |                             | 39006     | Not Available |
|          |                     |                |                            |                             | The Baruch Padeh Medical Center, Poriya         | The Baruch Padeh Medical Center, Poriya, Ethics Committee, M.P. Lower Galilee, 1528001, Tiberias,                                                                                                                 |                             | 39002     | Not Available |
|          | Italy               |                |                            |                             | A.O.U. Careggi                                  | A.O.U. Careggi, CEAVCE: Comitato Etico di Area Vasta Centro Regione Toscana, Presidente: Dr. Marco Matucci Cerinic, A.O.U. Careggi - Pad. 3 Didattica - Piano 2 St.219, Largo Brambilla, 3, 50134, Firenze, IT_TO | Toscana (IT_TO)             | 22002     | Not Available |
|          |                     |                |                            |                             | A.O.U. di Bologna Policlinico S.Orsola Malpighi | A.O.U. di Bologna Policlinico S.Orsola Malpighi, CE-AVEC: Comitato Etico Area Vasta Emilia Centro, Presidente: Dr. Primiano Iannone, Policlinico S.Orsola-Malpighi, Via Albertoni, 15, 40138, Bologna, IT-RE      | Emilia-Romagna (IT-RE)      | 22006     | Not Available |

| T Number | TC Country / Region | TC Centre Name                                              | TC Centre Location Address                                                                                                                                                                                                                                                                                 | TC Centre Location-Province | TU Centre Name                                              | TU Centre Location Address                                                                                                                                                                                                                                                                                              | TU Centre Location-Province | TU Number | TU Reference  |
|----------|---------------------|-------------------------------------------------------------|------------------------------------------------------------------------------------------------------------------------------------------------------------------------------------------------------------------------------------------------------------------------------------------------------------|-----------------------------|-------------------------------------------------------------|-------------------------------------------------------------------------------------------------------------------------------------------------------------------------------------------------------------------------------------------------------------------------------------------------------------------------|-----------------------------|-----------|---------------|
|          |                     |                                                             |                                                                                                                                                                                                                                                                                                            |                             | A.O.U. di Parma                                             | A.O.U. di Parma, CE-AVEN: Comitato Etico Area Vasta Emilia Nord, Presidente: Prof. Roberto Giuseppe Grilli, Policlinico di Modena, Direzione Assistenza Farmaceutica, Ingresso n.3, Piano Terra, Via del Pozzo, 71, 41124, Modena, IT-RE                                                                                | Emilia-Romagna (IT-RE)      | 22004     | Not Available |
|          |                     |                                                             |                                                                                                                                                                                                                                                                                                            |                             | ASST Lodi                                                   | ASST Lodi, COMITATO ETICO MILANO AREA 1, Presidente: Prof. Anna Maria Di Giulio, Ospedale Luigi Sacco, Via G.B. Grassi, 74, 20157, Milano, IT_LO                                                                                                                                                                        | Lombardia (IT_LO)           | 22011     | Not Available |
|          |                     |                                                             |                                                                                                                                                                                                                                                                                                            |                             | AUSL-IRCCS di Reggio Emilia                                 | AUSL-IRCCS di Reggio Emilia, CE-AVEN: Comitato Etico Area Vasta Emilia Nord, Presidente: Prof. Roberto Giuseppe Grilli, AUSL-IRCCS di Reggio Emilia, Via Vertoiba, 10a, 42124, Reggio Emilia, IT-RE                                                                                                                     | Emilia-Romagna (IT-RE)      | 22010     | Not Available |
|          |                     |                                                             |                                                                                                                                                                                                                                                                                                            |                             | Fondazione Policlinico Universitario Agostino Gemelli IRCCS | Fondazione Policlinico Universitario Agostino Gemelli IRCCS, COMITATO ETICO FONDAZIONE POLICLINICO UNIVERSITARIO AGOSTINO GEMELLI IRCCS UNIV.CATTOLICA, Presidente: Prof. Andrea Bacigalupo, Policlinico Universitario A. Gemelli - Ex Collegio Ioanneum - 1° piano stanza 221, Largo A. Gemelli, 8, 00168, Roma, IT_LA | Lazio (IT_LA)               | 22001     | Not Available |
|          |                     |                                                             |                                                                                                                                                                                                                                                                                                            |                             | IRCCS Istituti Clinici Scientifici Maugeri SpA SB           | IRCCS Istituti Clinici Scientifici Maugeri SpA SB, COMITATO ETICO ISTITUTI CLINICI SCIENTIFICI MAUGERI SPA - IRCCS, Presidente: Dr. Marcello Imbriani, ICS Maugeri Spa-SB, Via S. Maugeri, 4, 27100, Pavia, IT_LO                                                                                                       | Lombardia (IT_LO)           | 22003     | Not Available |
|          |                     |                                                             |                                                                                                                                                                                                                                                                                                            |                             | IRCCS Ospedale Policlinico San Martino                      | IRCCS Ospedale Policlinico San Martino, COMITATO ETICO REGIONALE DELLA LIGURIA, Presidente: Avv. Paolo Gianatti, Ospedale Policlinico San Martino, Largo R. Benzi, 10, 16132, Genova, IT_LI                                                                                                                             | Liguria (IT_LI)             | 22009     | Not Available |
|          |                     | Fondazione Policlinico Universitario Agostino Gemelli IRCCS | Fondazione Policlinico Universitario Agostino Gemelli IRCCS COMITATO ETICO FONDAZIONE POLICLINICO UNIVERSITARIO AGOSTINO GEMELLI IRCCS UNIV.CATTOLICA Presidente: Prof. Andrea Bacigalupo Policlinico Universitario A. Gemelli - Ex Collegio Ioanneum - 1° piano stanza 221 Largo A. Gemelli, 8 00168 Roma | Lazio (IT_LA)               |                                                             |                                                                                                                                                                                                                                                                                                                         |                             |           |               |

| T Number | TC Country / Region | TC Centre Name | TC Centre Location Address | TC Centre Location-Province | TU Centre Name                                              | TU Centre Location Address                                                                                                                                                                                                                                                                                             | TU Centre Location-Province | TU Number | TU Reference  |
|----------|---------------------|----------------|----------------------------|-----------------------------|-------------------------------------------------------------|------------------------------------------------------------------------------------------------------------------------------------------------------------------------------------------------------------------------------------------------------------------------------------------------------------------------|-----------------------------|-----------|---------------|
|          |                     |                |                            |                             | A.O.U. Careggi                                              | A.O.U. Careggi, CEAVCE: Comitato Etico di Area Vasta Centro Regione Toscana, Presidente: Dr. Marco Matucci Cerinic, A.O.U. Careggi - Pad. 3 Didattica - Piano 2 St.219, Largo Brambilla, 3, 50134, Firenze, IT_TO                                                                                                      | Toscana (IT_TO)             | 22002     | Not Available |
|          |                     |                |                            |                             | A.O.U. di Bologna Policlinico S.Orsola Malpighi             | A.O.U. di Bologna Policlinico S.Orsola Malpighi, CE-AVEC: Comitato Etico Area Vasta Emilia Centro, Presidente: Dr. Primiano Iannone, Policlinico S.Orsola Malpighi, Via Albertoni, 15, 40138, Bologna, IT-RE                                                                                                           | Emilia-Romagna (IT-RE)      | 22006     | Not Available |
|          |                     |                |                            |                             | A.O.U. di Parma                                             | A.O.U. di Parma, CE-AVEN: Comitato Etico Area Vasta Emilia Nord, Presidente: Prof. Roberto Giuseppe Grilli, Policlinico di Modena, Direzione Assistenza Farmaceutica, Ingresso n.3, Piano Terra, Via del Pozzo, 71, 41124, Modena, IT-RE                                                                               | Emilia-Romagna (IT-RE)      | 22004     | Not Available |
|          |                     |                |                            |                             | ASST Lodi                                                   | ASST Lodi, COMITATO ETICO MILANO AREA 1, Presidente: Prof. Anna Maria Di Giulio, Ospedale Luigi Sacco, Via G.B. Grassi, 74, 20157, Milano, IT_LO                                                                                                                                                                       | Lombardia (IT_LO)           | 22011     | Not Available |
|          |                     |                |                            |                             | AUSL-IRCCS di Reggio Emilia                                 | AUSL-IRCCS di Reggio Emilia, CE-AVEN: Comitato Etico Area Vasta Emilia Nord, Presidente: Prof. Roberto Giuseppe Grilli, AUSL-IRCCS di Reggio Emilia, Via Vertoiba, 10a, 42124, Reggio Emilia, IT-RE                                                                                                                    | Emilia-Romagna (IT-RE)      | 22010     | Not Available |
|          |                     |                |                            |                             | Fondazione Policlinico Universitario Agostino Gemelli IRCCS | Fondazione Policlinico Universitario Agostino Gemelli IRCCS, COMITATO ETICO FONDAZIONE POLICLINICO UNIVERSITARIO AGOSTINO GEMELLI IRCCS UNIV.CATTOLICA, Presidente: Prof. Andrea Bacigalupo, Policlinico Universitario A. Gemelli - Ex Collegio Ianneum - 1° piano stanza 221, Largo A. Gemelli, 8, 00168, Roma, IT_LA | Lazio (IT_LA)               | 22001     | Not Available |
|          |                     |                |                            |                             | IRCCS Istituti Clinici Scientifici Maugeri SpA SB           | IRCCS Istituti Clinici Scientifici Maugeri SpA SB, COMITATO ETICO ISTITUTI CLINICI SCIENTIFICI MAUGERI SPA - IRCCS, Presidente: Dr. Marcello Imbriani, ICS Maugeri Spa-SB, Via S. Maugeri, 4, 27100, Pavia, IT_LO                                                                                                      | Lombardia (IT_LO)           | 22003     | Not Available |

| T Number | TC Country / Region | TC Centre Name | TC Centre Location Address | TC Centre Location-Province | TU Centre Name                         | TU Centre Location Address                                                                                                                                                                  | TU Centre Location-Province                                                                                                             | TU Number       | TU Reference  |               |
|----------|---------------------|----------------|----------------------------|-----------------------------|----------------------------------------|---------------------------------------------------------------------------------------------------------------------------------------------------------------------------------------------|-----------------------------------------------------------------------------------------------------------------------------------------|-----------------|---------------|---------------|
|          |                     |                |                            |                             | IRCCS Ospedale Policlinico San Martino | IRCCS Ospedale Policlinico San Martino, COMITATO ETICO REGIONALE DELLA LIGURIA, Presidente: Avv. Paolo Gianatti, Ospedale Policlinico San Martino, Largo R. Benzi, 10, 16132, Genova, IT_LI | Liguria (IT_LI)                                                                                                                         | 22009           | Not Available |               |
|          | Japan               |                |                            |                             | Adachi Kyosai Hospital                 | Adachi Kyosai Hospital, Institutional Review Board, 1- 36-8 Yanagihara, 120-0022, Adachi-ku, JP-13                                                                                          | Tokyo (JP-13)                                                                                                                           | 20004           | Not Available |               |
|          |                     |                |                            |                             |                                        |                                                                                                                                                                                             |                                                                                                                                         | 20008           | Not Available |               |
|          |                     |                |                            |                             |                                        | Nagaoka Red Cross Hospital                                                                                                                                                                  | Nagaoka Red Cross Hospital, Institutional Review Board, 2-297-1 Chiaki, 940-2085, Nagaoka, JP-15                                        | Niigata (JP-15) | 20014         | Not Available |
|          |                     |                |                            |                             |                                        | Review Board of Human Rights and Ethics for Clinical Studies                                                                                                                                | Review Board of Human Rights and Ethics for Clinical Studies, Institutional Review Board, 13-2 Ichiban-cho, 102-0082, Chiyoda-ku, JP-13 | Tokyo (JP-13)   | 20001         | Not Available |
|          |                     |                |                            |                             |                                        |                                                                                                                                                                                             |                                                                                                                                         |                 | 20015         | Not Available |
|          |                     |                |                            |                             | Sone Clinic                            | Sone Clinic, Institutional Review Board, 3-32-8 Shinjuku, 160-0022, Shinjuku-ku, JP-13                                                                                                      | Tokyo (JP-13)                                                                                                                           | 20019           | Not Available |               |

| T Number | TC Country / Region | TC Centre Name | TC Centre Location Address | TC Centre Location-Province | TU Centre Name | TU Centre Location Address                                                                     | TU Centre Location-Province | TU Number | TU Reference  |
|----------|---------------------|----------------|----------------------------|-----------------------------|----------------|------------------------------------------------------------------------------------------------|-----------------------------|-----------|---------------|
|          |                     |                |                            |                             |                |                                                                                                |                             | 20020     | Not Available |
|          |                     |                |                            |                             | Sugiura Clinic | Sugiura Clinic, Institutional Review Board, 4-4-16-30...<br>Honcho, 332-0012, Kawaguchi, JP-11 | Saitama (JP-11)             | 20002     | Not Available |
|          |                     |                |                            |                             |                |                                                                                                |                             | 20005     | Not Available |
|          |                     |                |                            |                             |                |                                                                                                |                             | 20006     | Not Available |
|          |                     |                |                            |                             |                |                                                                                                |                             | 20007     | Not Available |
|          |                     |                |                            |                             |                |                                                                                                |                             | 20018     | Not Available |
|          |                     |                |                            |                             |                |                                                                                                |                             | 20021     | Not Available |

| T Number | TC Country / Region | TC Centre Name                 | TC Centre Location Address                                                     | TC Centre Location-Province | TU Centre Name                                   | TU Centre Location Address                                                                                       | TU Centre Location-Province | TU Number | TU Reference  |
|----------|---------------------|--------------------------------|--------------------------------------------------------------------------------|-----------------------------|--------------------------------------------------|------------------------------------------------------------------------------------------------------------------|-----------------------------|-----------|---------------|
|          |                     |                                |                                                                                |                             | Takeda Hospital Group Institutional Review Board | Takeda Hospital Group Institutional Review Board, 28- 1, Ishidamoriminamicho, Fushimi-ku, 601-1495, Kyoto, JP-26 | (JP-26)                     | 20009     | Not Available |
|          | Lithuania           | Lithuanian Bioethics Committee | Lithuanian Bioethics Committee Algirdo str. 31 LT-03219 Vilnius                |                             |                                                  |                                                                                                                  |                             |           |               |
|          |                     |                                |                                                                                |                             | Lithuanian Bioethics Committee                   | Lithuanian Bioethics Committee, Algirdo str. 31, LT-03219, Vilnius,                                              |                             | 57002     | 57002         |
|          | Netherlands         | St. Antonius Ziekenhuis        | St. Antonius Ziekenhuis MEC-U Koekoekslaan 1, 3435 CM NIEUWEGEIN               |                             |                                                  |                                                                                                                  |                             |           |               |
|          | Poland              | Komisja Bioetyczna przy OIL    | Komisja Bioetyczna przy OIL ul. Powstancow Warszawy 11 Bydgoszcz               |                             |                                                  |                                                                                                                  |                             |           |               |
|          | Portugal            | CEIC                           | CEIC Parque da Saude de Lisboa Av. do Brasil, no. 53-Pav. 17-A 1749-004 Lisboa | Lisboa (PT- 11)             |                                                  |                                                                                                                  |                             |           |               |
|          |                     |                                |                                                                                |                             | CEIC                                             | CEIC, Parque da Saude de Lisboa, Av. do Brasil, no. 53-Pav. 17-A, 1749-004, Lisboa, PT-11                        | Lisboa (PT- 11)             | 42001     | 42001         |

| T Number | TC Country / Region | TC Centre Name | TC Centre Location Address | TC Centre Location-Province | TU Centre Name | TU Centre Location Address | TU Centre Location-Province | TU Number | TU Reference |
|----------|---------------------|----------------|----------------------------|-----------------------------|----------------|----------------------------|-----------------------------|-----------|--------------|
|          |                     |                |                            |                             |                |                            |                             | 42002     | 42002        |
|          |                     |                |                            |                             |                |                            |                             | 42003     | 42003        |
|          |                     |                |                            |                             |                |                            |                             | 42004     | 42004        |
|          |                     |                |                            |                             |                |                            |                             | 42005     | 42005        |
|          |                     |                |                            |                             |                |                            |                             | 42006     | 42006        |
|          |                     |                |                            |                             |                |                            |                             | 42007     | 42007        |
|          |                     |                |                            |                             |                |                            |                             | 42008     | 42008        |



| T Number | TC Country / Region | TC Centre Name | TC Centre Location Address | TC Centre Location-Province | TU Centre Name                         | TU Centre Location Address                                                              | TU Centre Location-Province | TU Number | TU Reference  |
|----------|---------------------|----------------|----------------------------|-----------------------------|----------------------------------------|-----------------------------------------------------------------------------------------|-----------------------------|-----------|---------------|
|          |                     |                |                            |                             |                                        |                                                                                         |                             | 42009     | 42009         |
|          |                     |                |                            |                             |                                        |                                                                                         |                             | 42011     | 42011         |
|          | Russian Federation  |                |                            |                             | ArteMed Assistans                      | ArteMed Assistans, 55, litera A, Pionerskaya st., office 1n/1, 197110, St. Petersburg,  |                             | 51015     | Not Available |
|          |                     |                |                            |                             | Chelyabinsk Regional Clinical Hospital | Chelyabinsk Regional Clinical Hospital, 70, Vorovskogo st., 454076, Chelyabinsk,        |                             | 51016     | Not Available |
|          |                     |                |                            |                             | City Clinical Hospital #1 Orenburg     | City Clinical Hospital #1 Orenburg, 23, Gagarina prospekt, 460040, Orenburg,            |                             | 51017     | Not Available |
|          |                     |                |                            |                             | City Hospital #31                      | City Hospital #31, Local Ethical Committee, 3, Dinamo prospekt, 197110, St. Petersburg, |                             | 51004     | Not Available |
|          |                     |                |                            |                             | LLC Dialysis center                    | LLC Dialysis center, Ethical Committee, 35, Valovaya street, 115054, Moscow,            |                             | 51008     | Not Available |

| T Number | TC Country / Region | TC Centre Name                             | TC Centre Location Address                                                                                                                                                              | TC Centre Location-Province | TU Centre Name                             | TU Centre Location Address                                                                           | TU Centre Location-Province | TU Number | TU Reference  |
|----------|---------------------|--------------------------------------------|-----------------------------------------------------------------------------------------------------------------------------------------------------------------------------------------|-----------------------------|--------------------------------------------|------------------------------------------------------------------------------------------------------|-----------------------------|-----------|---------------|
|          |                     |                                            |                                                                                                                                                                                         |                             |                                            |                                                                                                      |                             | 51009     | Not Available |
|          |                     |                                            |                                                                                                                                                                                         |                             | LLC Fresenius medical care Kuban           | LLC Fresenius medical care Kuban, Local Ethical Committee, 22, Cherkasskaya str., 350029, Krasnodar, |                             | 51006     | Not Available |
|          |                     |                                            |                                                                                                                                                                                         |                             | LLC Yaroslavl dialysis center              | LLC Yaroslavl dialysis center, Local Ethical Committee, 7, Yakovlevskaya str., 150062, Yaroslavl,    |                             | 51010     | Not Available |
|          |                     |                                            |                                                                                                                                                                                         |                             | Republican Hospital n.a. V.A. Baranov      | Republican Hospital n.a. V.A. Baranov, 3, Pirogova st., 185019, Petrozavodsk,                        |                             | 51014     | Not Available |
|          |                     |                                            |                                                                                                                                                                                         |                             | St. Petersburg SBHI "Municipal Mariinskaya | St. Petersburg SBHI "Municipal Mariinskaya, 56, Liteiny prospect, 191014, St. Petersburg,            |                             | 51007     | Not Available |
|          |                     |                                            |                                                                                                                                                                                         |                             | Sverdlovsk Regional Clinical Hospital #1   | Sverdlovsk Regional Clinical Hospital #1, 185, Volgogradskaya st., 620102, Yekaterinburg,            |                             | 51002     | Not Available |
|          | Spain               | Hospital Clínico Universitario de Valencia | Hospital Clínico Universitario de Valencia Secretaría Comité Etico de Investigación Clínica Fundación Hospital Clínico Universitario de Valencia Avda. Blasco Ibañez, 17 46010 Valencia | Valencia (ES- V)            |                                            |                                                                                                      |                             |           |               |

| T Number | TC Country / Region | TC Centre Name                   | TC Centre Location Address                                                                                           | TC Centre Location-Province | TU Centre Name                                             | TU Centre Location Address                                                                                                                                                                 | TU Centre Location-Province | TU Number | TU Reference  |
|----------|---------------------|----------------------------------|----------------------------------------------------------------------------------------------------------------------|-----------------------------|------------------------------------------------------------|--------------------------------------------------------------------------------------------------------------------------------------------------------------------------------------------|-----------------------------|-----------|---------------|
|          | Turkey              | Kocaeli Universitesi Etik Kurulu | Kocaeli Universitesi Etik Kurulu Kocaeli Universitesi Umuttepe yerleskesi Universite etik kurulu 41380 Izmit/Kocaeli |                             |                                                            |                                                                                                                                                                                            |                             |           |               |
|          | Ukraine             |                                  |                                                                                                                      |                             | Brovarskaya multidisciplinary clinical hospital            | Brovarskaya multidisciplinary clinical hospital, Ethical Committee, 14, Shevchenko st, 07400, Brovary,                                                                                     |                             | 53001     | Not Available |
|          |                     |                                  |                                                                                                                      |                             | Dnepropetrovsk regional hospital n.a. I. I. Mechnikov      | Dnepropetrovsk regional hospital n.a. I. I. Mechnikov, 14 Sobornaya str., 49005, Dnipro,                                                                                                   |                             | 53016     | Not Available |
|          |                     |                                  |                                                                                                                      |                             | Kharkiv regional Clinical Centre of urology and nephrology | Kharkiv regional Clinical Centre of urology and nephrology, Ethical Committee, 195 Moskovsky av., 61037, Kharkiv,                                                                          |                             | 53006     | Not Available |
|          |                     |                                  |                                                                                                                      |                             | Kyiv City Center of Nephrology and Dialysis                | Kyiv City Center of Nephrology and Dialysis, Ethical Committee, 26, Str. Petra Zaporozhtsia, 02660, Kyiv,                                                                                  |                             | 53002     | Not Available |
|          |                     |                                  |                                                                                                                      |                             | Lutsk city clinical hospital                               | Lutsk city clinical hospital, Ethical Committee, 13 Vidrodzhenia av., 43024, Lutsk,                                                                                                        |                             | 53009     | Not Available |
|          |                     |                                  |                                                                                                                      |                             | Medical center LLC " Fresenius medical care Ukraine»       | Medical center LLC " Fresenius medical care Ukraine», Ethics Committee of Medical center LLC Fresenius medical care Ukraine, 32 Dakhnovskaya street / 2 Meditsinsky lane, 18009, Cherkasy, |                             | 53003     | Not Available |

| T Number | TC Country / Region | TC Centre Name | TC Centre Location Address | TC Centre Location-Province | TU Centre Name                                              | TU Centre Location Address                                                                                                               | TU Centre Location-Province | TU Number | TU Reference  |
|----------|---------------------|----------------|----------------------------|-----------------------------|-------------------------------------------------------------|------------------------------------------------------------------------------------------------------------------------------------------|-----------------------------|-----------|---------------|
|          |                     |                |                            |                             | Mykolaiv Regional Clinical Hospital                         | Mykolaiv Regional Clinical Hospital, Ethical Committee, 1 Kyivska str., 54058, Mykolaiv,                                                 |                             | 53011     | Not Available |
|          |                     |                |                            |                             | Poltava Regional Clinical Hospital n.a. M.V. Skliphosovskyi | Poltava Regional Clinical Hospital n.a. M.V. Skliphosovskyi, Ethical Committee, Shevchenko str 23, 36011, Poltava,                       |                             | 53018     | Not Available |
|          |                     |                |                            |                             | Regional Clinical Hospital - Ivano-Frankivsk                | Regional Clinical Hospital - Ivano-Frankivsk, Ethics Committee of Regional clinical hospital, Fedkovycha str 91, 76000, Ivano-Frankivsk, |                             | 53005     | Not Available |
|          |                     |                |                            |                             | State Institution "Institute of Nephrology" NAMS of Ukraine | State Institution "Institute of Nephrology" NAMS of Ukraine, Kyiv City Nephrology Center, 26 Petra Zaporozhtsya str, 02225, Kyiv,        |                             | 53008     | Not Available |
|          |                     |                |                            |                             | Transcarpatian Regional Clinical Hospital                   | Transcarpatian Regional Clinical Hospital, Ethical Committee, 22 Kapushanska str., 88018, Uzhgorod,                                      |                             | 53015     | Not Available |
|          |                     |                |                            |                             | Vinnitsa Regional Clinical Hospital im. N.I. Pirogov        | Vinnitsa Regional Clinical Hospital im. N.I. Pirogov, Ethical Committee, 46 Pirogova Street, 21018, Vinnytsia,                           |                             | 53013     | Not Available |
|          |                     |                |                            |                             | Zaporizhzhia Regional Clinical Hospital                     | Zaporizhzhia Regional Clinical Hospital, Local Ethical Committee, 10 Orirhivske shosse, 69600, Zaporizhzhya,                             |                             | 53014     | Not Available |

| T Number | TC Country / Region      | TC Centre Name | TC Centre Location Address                                   | TC Centre Location-Province | TU Centre Name | TU Centre Location Address                                              | TU Centre Location-Province | TU Number | TU Reference  |
|----------|--------------------------|----------------|--------------------------------------------------------------|-----------------------------|----------------|-------------------------------------------------------------------------|-----------------------------|-----------|---------------|
|          | United States of America | Advarra IRB    | Advarra IRB 6100 Merriweather Drive Suite 600 21044 Columbia | Maryland (US-MD)            |                |                                                                         |                             |           |               |
|          |                          |                |                                                              |                             | Advarra IRB    | Advarra IRB, 6100 Merriweather Drive, Suite 600, 21044, Columbia, US-MD | Maryland (US-MD)            | 14001     | Not Available |
|          |                          |                |                                                              |                             |                |                                                                         |                             | 14002     | Not Available |
|          |                          |                |                                                              |                             |                |                                                                         |                             | 14003     | Not Available |
|          |                          |                |                                                              |                             |                |                                                                         |                             | 14004     | Not Available |
|          |                          |                |                                                              |                             |                |                                                                         |                             | 14005     | Not Available |
|          |                          |                |                                                              |                             |                |                                                                         |                             | 14006     | Not Available |

| T Number | TC Country / Region | TC Centre Name | TC Centre Location Address | TC Centre Location-Province | TU Centre Name | TU Centre Location Address | TU Centre Location-Province | TU Number | TU Reference  |
|----------|---------------------|----------------|----------------------------|-----------------------------|----------------|----------------------------|-----------------------------|-----------|---------------|
|          |                     |                |                            |                             |                |                            |                             | 14007     | Not Available |
|          |                     |                |                            |                             |                |                            |                             | 14008     | Not Available |
|          |                     |                |                            |                             |                |                            |                             | 14009     | Not Available |
|          |                     |                |                            |                             |                |                            |                             | 14010     | Not Available |
|          |                     |                |                            |                             |                |                            |                             | 14011     | Not Available |
|          |                     |                |                            |                             |                |                            |                             | 14013     | Not Available |
|          |                     |                |                            |                             |                |                            |                             | 14014     | Not Available |

| T Number | TC Country / Region | TC Centre Name | TC Centre Location Address | TC Centre Location-Province | TU Centre Name | TU Centre Location Address | TU Centre Location-Province | TU Number | TU Reference  |
|----------|---------------------|----------------|----------------------------|-----------------------------|----------------|----------------------------|-----------------------------|-----------|---------------|
|          |                     |                |                            |                             |                |                            |                             | 14015     | Not Available |
|          |                     |                |                            |                             |                |                            |                             | 14016     | Not Available |
|          |                     |                |                            |                             |                |                            |                             | 14017     | Not Available |
|          |                     |                |                            |                             |                |                            |                             | 14018     | Not Available |
|          |                     |                |                            |                             |                |                            |                             | 14019     | Not Available |
|          |                     |                |                            |                             |                |                            |                             | 14020     | Not Available |
|          |                     |                |                            |                             |                |                            |                             | 14022     | Not Available |

| T Number | TC Country / Region | TC Centre Name | TC Centre Location Address | TC Centre Location-Province | TU Centre Name | TU Centre Location Address | TU Centre Location-Province | TU Number | TU Reference  |
|----------|---------------------|----------------|----------------------------|-----------------------------|----------------|----------------------------|-----------------------------|-----------|---------------|
|          |                     |                |                            |                             |                |                            |                             | 14023     | Not Available |
|          |                     |                |                            |                             |                |                            |                             | 14024     | Not Available |
|          |                     |                |                            |                             |                |                            |                             | 14025     | Not Available |
|          |                     |                |                            |                             |                |                            |                             | 14027     | Not Available |
|          |                     |                |                            |                             |                |                            |                             | 14030     | Not Available |
|          |                     |                |                            |                             |                |                            |                             | 14031     | Not Available |
|          |                     |                |                            |                             |                |                            |                             | 14032     | Not Available |



| T Number | TC Country / Region | TC Centre Name | TC Centre Location Address | TC Centre Location-Province | TU Centre Name | TU Centre Location Address | TU Centre Location-Province | TU Number | TU Reference  |
|----------|---------------------|----------------|----------------------------|-----------------------------|----------------|----------------------------|-----------------------------|-----------|---------------|
|          |                     |                |                            |                             |                |                            |                             | 14033     | Not Available |
|          |                     |                |                            |                             |                |                            |                             | 14038     | Not Available |

## Outcome Definitions

### Safety outcomes

#### *Clinically relevant bleeding*

Randomized participants were evaluated for the occurrence of bleeding events after signing informed consent until the end of the post-treatment follow-up. All bleeding events (other than the normal bleeding from arteriovenous graft or fistula post-dialysis) were reported as adverse events and submitted to the Central Independent Adjudication Committee.

Clinically relevant bleeding, the composite of major and clinically relevant nonmajor bleeding, was the primary safety outcome. The Central Independent Adjudication Committee classified bleeding events in alignment with the International Society on Thrombosis and Haemostasis definitions.<sup>1</sup>

Major bleeding was defined as symptomatic bleeding with one of the following:

- bleeding that contributed to death
- symptomatic bleeding in a critical area or organ, such as intracranial, intraspinal, intraocular, retroperitoneal, intraarticular or pericardial, or intramuscular with compartment syndrome
- bleeding causing a fall in hemoglobin level of 2 g/dL (1.24 mmol/L) or more, or leading to transfusion of two or more units of whole blood or packed red blood cells.

Clinically relevant nonmajor bleeding events were classified as any sign or symptom of hemorrhage (e.g., more bleeding than would be expected for a clinical circumstance, including bleeding found by imaging alone) that did not fit the criteria for the International

Society on Thrombosis and Haemostasis definition of major bleeding, but met at least one of the following criteria:

- requiring medical intervention by a healthcare professional
- led to hospitalization or increased level of care
- prompting a face-to-face evaluation (i.e., not a telephone or electronic communication).

Bleeding after dialysis from arteriovenous graft or fistulas was expected and was only reported as an adverse event and submitted to the Central Independent Adjudication Committee if there was a change in the pattern, duration, or intensity of bleeding, or if exceptional measures were taken for hemostasis beyond normal, relative to post-dialysis bleeding that was observed in that participant over (approximately) the prior 4 weeks.

#### *Assessment of Arteriovenous Access Bleeding*

The severity of access site bleeding was assessed approximately 15 minutes after removal of the dialysis needle(s) from the arteriovenous access according to the following categories:

- “0” – no access bleeding
- “1” – slow oozing
- “2” – overt bleeding.

If the arteriovenous access exhibited overt bleeding 15 minutes after removal of the dialysis needle(s) (score of 2), the investigator could consider a reduction in the dose of heparin (i.e., unfractionated or low-molecular-weight heparin) for the subsequent dialysis sessions during the treatment and follow-up periods.

If a dialysis catheter was used, the extent of arteriovenous access bleeding was not determined.

Recommendations for bleeding and surgery management can be found in Section 8.2.2.2 of the clinical study protocol.

#### *Adverse events*

Adverse events were reported directly by the participant or by the participant's caregiver or legally authorized representative from the time of providing informed consent to the last follow-up visit. All serious adverse events had to be reported within 24 hours.

Using the case report form, investigators or qualified designees were responsible for recording and documenting reported events that met the adverse event or serious adverse event definitions, including details regarding the intensity of the event and its relationship to the study treatment. Furthermore, the investigator or designee followed up on any adverse events that were serious, considered related to the study treatment or procedures, or that led to treatment or study discontinuation. The responsibility to actively monitor adverse events and serious adverse events did not extend beyond the end of the study. However, if an investigator learned of a serious adverse event (including death) that occurred after the end of the study and considers it to be reasonably related to study intervention or participation, the investigator had to notify the sponsor.

#### **Efficacy Outcomes**

##### *Major adverse vascular events:*

Major adverse vascular events included the following, the definitions for which are detailed in Chapter 5 of the Clinical Events Committee Adjudication Manual:

- death due to myocardial infarction, ischemic stroke, pulmonary embolism, noncentral nervous system systemic embolism, and undetermined – presumed cardiovascular death
- nonfatal stroke (ischemic stroke or undetermined type)
- nonfatal myocardial infarction
- major amputation of vascular etiology
- acute limb ischemia
- symptomatic venous thromboembolism
- systemic embolism.

*Arteriovenous fistula or graft thrombosis:*

Access site thrombosis was defined as the absence of a bruit or thrill and/or the inability to initiate dialysis successfully via the fistula or graft.

*Dialysis circuit clotting*

Clotting in the dialysis circuit was assessed using a semiquantitative scale. After every dialysis session, the dialysis nurse (or another qualified individual) assigned clotting scores as follows:

- “0” – clean filter and no visible clots in the drip chamber/air trap
- “1” – traces of coagulation in the filter and/or in the drip chamber/air trap
- “2” – intermediate state between “1” and “3”
- “3” – fully clotted extracorporeal system resulting in an interruption of the hemodialysis session.

Adequate anticoagulation was defined as a semiquantitative clotting scale score of 1 or less.

*Known atherosclerosis*

Known atherosclerosis was defined as the composite of the following criteria:

(1) any surrogate of coronary artery disease (history of myocardial infarction, angina pectoris, coronary artery bypass graft surgery, percutaneous coronary intervention, coronary artery stent insertion, aortic aneurysm, coronary artery disease)

or

(2) any surrogate of cerebrovascular disease (history of ischemic stroke, transient ischemic attack, or carotid endarterectomy)

or

(3) any surrogate of peripheral artery disease (history of peripheral artery disease, amputation, peripheral artery bypass, or vascular stent insertion)

## REFERENCE

1. Kaatz S, Ahmad D, Spyropoulos AC, Schulman S, Subcommittee on Control of Anticoagulation. Definition of clinically relevant non-major bleeding in studies of anticoagulants in atrial fibrillation and venous thromboembolic disease in non-surgical patients: communication from the SSC of the ISTH. *J Thromb Haemost.* 2015;13(11):2119-26
